# Supplementary material
Source: PubMed Central journal article supplement (PMC2335360)

## SUPPLEMENTAL INFORMATION

### NUCLEAR RESPIRATORY FACTOR 1 CONTROLS MYOCYTE ENHANCER FACTOR 2A TRANSCRIPTION TO PROVIDE A MECHANISM FOR COORDINATE EXPRESSION OF RESPIRATORY CHAIN SUBUNITS

Bindu Ramachandran<sup>†‡</sup>, Gengsheng Yu<sup>†§‡</sup> and Tod Gulick<sup>†¶\*</sup>

Running Title: *NRF1 Regulates MEF2A Expression*

From the <sup>†</sup>Diabetes Research Laboratory, Department of Medicine,  
Massachusetts General Hospital, CNY 149 8218, Charlestown, Massachusetts 02129, and  
the <sup>¶</sup>Department of Medicine, Harvard Medical School, Boston, Massachusetts 02115.

\*Correspondence address: Tod Gulick, Diabetes Research Laboratory, Massachusetts General Hospital, CNY 149 8219, Charlestown, MA 02129. TEL: 617-724-2356, FAX: 617-726-9452, email: gulick@helix.mgh.harvard.edu.

#### SUPPLEMENTAL TABLE

| Species                      |            | MEF2 element |                   | MEF2 element |                   |             |
|------------------------------|------------|--------------|-------------------|--------------|-------------------|-------------|
|                              |            | consensus:   | YTAWWWWTAG        | consensus:   | YTAWWWWTAG        |             |
| <i>Homo sapiens</i>          | human      | aggccccatt   | <b>TTAAATATAG</b> | aaa...ccc    | ctaagaatag        | ccgccagtgc  |
| <i>Pan troglodytes</i>       | chimpanzee | aggccccatt   | <b>TTAAATATAG</b> | aaa...ccc    | ctaagaatag        | ccgccagtgc  |
| <i>Equus caballus</i>        | horse      | aggccccatt   | <b>TTAAATATAG</b> | aaaa...ccc   | <b>CTAAAAATAG</b> | ccaccatata  |
| <i>Canine familiaris</i>     | dog        | aggcctcggt   | <b>TTAAATATAG</b> | aaa...ccc    | <b>CTAAAAATAG</b> | ccaccatagt  |
| <i>Echinops telfairi</i>     | hedgehog   | aggcctcggt   | <b>TTAAATATAG</b> | aaccactcca   | <b>CTAAAAATAG</b> | ccactcgtgg  |
| <i>Sorex araneus</i>         | shrew      | agggtgctcatt | <b>TTAAATATAG</b> | aagg...ccc   | <b>CTAAAAATAG</b> | tcgtccctct  |
| <i>Tupaia belangeri</i>      | tree shrew | tggteccatt   | <b>TTAAATATAG</b> | aaa...cct    | <b>CTAAAAATAG</b> | ccgccctgtg  |
| <i>Cavia porcellus</i>       | guinea pig | aggcctcatt   | <b>TTAAATATAG</b> | aaga...ctc   | <b>TTAAAAATAG</b> | ccaccaccgt  |
| <i>S. tridecemlineatus</i>   | squirrel   | aggccccact   | <b>TTAAATATAG</b> | aaga...ccc   | <b>CTAAAAATAG</b> | ccaccacaagt |
| <i>Microcebus murinus</i>    | lemur      | aggccccatt   | acaaatatag        | aaaa...ccc   | <b>CTAAAAATAG</b> | ccactcatgt  |
| <i>Macaca mulatta</i>        | monkey     | aggaccatt    | gtaaatatag        | aaa...cct    | <b>CTAAAAATAG</b> | ccgctcgtgc  |
| <i>Bos taurus</i>            | cow        | aggcctcatt   | tcaaatatag        | aaa...ccc    | <b>CTAAAAATAG</b> | ccaccattc   |
| <i>Rattus norvegicus</i>     | rat        | aagaccact    | ttagtcagag        | aaag...tcc   | <b>CTAAAAATAG</b> | ccatccatgt  |
| <i>Mus musculus</i>          | mouse      | aagaccact    | ttagatagag        | aaag...ccc   | <b>CTAAAAATAG</b> | ccatccatgt  |
| <i>Oryctolagus cuniculus</i> | rabbit     | agggccatt    | ttaaagatag        | aat...cgcc   | <b>CTAAAAATAG</b> | gctggcacgt  |
|                              | consensus  | argncycryt   | <b>TTAAATATAG</b> | aa...nn.ccc  | <b>CTAAAAATAG</b> | ccryccrny   |

**Table S1. Mammalian *COX6AH* gene promoters have one or two MEF2 elements.** Alignment of proximal promoter regions of indicated mammalian *COX6AH* gene promoters. Sequences are from GenBank entries NW926306 (human), NW001225986 (chimpanzee), AAWR01032917 (horse), AAEX02025257 (dog), AAIY01181867 (hedgehog), AALT01114760 (shrew), AAPY01475073 (tree shrew), AAKN01631614 (guinea pig), AAQQ1679455 (squirrel), ABDC01254277 (lemur), AANU01233186 (rhesus monkey), AAF03083249 (cow), NW047562 (rat), NW001030877 (mouse), AAGW01554864 (rabbit).

## SUPPLEMENTAL FIGURES

**Fig. S1. *MEF2A* gene promoter MEF2 and NRF elements are conserved among mammals.** Alignment of mammalian *MEF2A* gene 5' transcriptional regulatory sequences showing evolutionary conservation of the NRF1 and MEF2 elements and within the ~0.8 kb expanse upstream of these sites, including E boxes and putative NRF2 and NF-AT elements. Element consensus sequences are shown above the aligned sequences, with strict consensus in bold upper case. Gene sequences that conform to consensus are in bold. Exon sequences are in upper case. Locations of the major (TSS p<sub>1</sub>) and two minor (TSS p<sub>1</sub>', TSS p<sub>1</sub>'') promoter 1 transcription start sites are shown (17). Numbers reference locations with respect to the human gene TSS p<sub>1</sub> (= +1). Sequences are from GenBank entries AC013526 (*Hs*, human), AADA01045866 (*Pt*, chimpanzee), AANU01176656 (*Mac*, rhesus monkey), AC164694 (*Bt*, cow), CE302601 (*Cf*, dog), AC120123 (*Mm*, mouse), AC134737 (*Rn*, rat), AAQQ01634896 (*St*, squirrel), AAGV01302117 (*Dn*, armadillo), and AAFR03022775 (*Md*, opossum).

**Fig. S2. The *MEF2C* alternative promoter 3 has conserved NRF1 and MEF2 elements.** Schematics of mammalian *MEF2C* structural gene (A.) and alternative splicing patterns (B.). Definitive alternative first exons (A<sub>n</sub>), definitive nested 5' exons (B→D), ambiguous alternative first vs. nested exons (x<sub>n</sub>), exons with coding sequences (1→9) and alternative coding sequence exons/regions (α, β, γ) (15,16) are shown. C. Locations of conserved regulatory elements in *MEF2C* promoter 3 (p<sub>3</sub>). E, E box; M, MEF2; NI, NRF1 elements. D. Alignment of putative NRF1 elements from human (*Hs*), murine (*Mm*) and bovine (*Bt*) *MEF2C* p<sub>3</sub>. Sequences are from GenBank entries AC008835 (human), AC092258 (mouse), AC172036 (cow). E. Mobility shift assay using NRF1<sub>myc</sub> and human *MEF2C* and *MEF2A* NRF1 element probes and cross competition.

**Fig. S3. *Drosophila Mef2* enhancer IIE has paired functional EWG and MEF2 sites.** A. Schematic of the *Drosophila Mef2* (*DMef2*) 5' regulatory region, showing location of the IIE enhancer (39) and MEF2 (*M*) (40) and putative EWG/NRF1 (*NI*) and NRF2 (*N2*) elements. B. Alignment of human *δALAS* (9) and *MEF2A* NRF1 elements and the putative *DMef2* IIE EWG element. C. Mobility shift assay using recombinant NRF1<sub>myc</sub> and *DMef2* and *MEF2A* NRF1 element probes and cross competition. D. Cells were transfected with indicated reporters, harvested for luciferase determinations after 48 hr, and analyzed and normalized as in Fig. 4. IIE-Luc contains the *DMef2* IIE enhancer upstream of the minimal E1B tata box. IIE[m1<sub>EWG</sub>]-Luc has a mutation in the EWG/NRF1 element but is otherwise identical.

*NRF1 Regulates MEF2A Expression*  
Figure S1.

|                                                                                                                                                                                                                                                                                                                                                                                                                                                                                                                                                                                                                                                                                                |                                                                                                                                                                                                                                                                                                                                                                                                                                                                                                                                                                                                                                                                                                   |                                                                                                                                                                                                                                                                                                                                                                                                                                                                                                                                                                                                                                                                                                   |                                                                                                                                                                                                                                                                                                                                                                                                                                                                                                                                                                                                                                                                                                     |
|------------------------------------------------------------------------------------------------------------------------------------------------------------------------------------------------------------------------------------------------------------------------------------------------------------------------------------------------------------------------------------------------------------------------------------------------------------------------------------------------------------------------------------------------------------------------------------------------------------------------------------------------------------------------------------------------|---------------------------------------------------------------------------------------------------------------------------------------------------------------------------------------------------------------------------------------------------------------------------------------------------------------------------------------------------------------------------------------------------------------------------------------------------------------------------------------------------------------------------------------------------------------------------------------------------------------------------------------------------------------------------------------------------|---------------------------------------------------------------------------------------------------------------------------------------------------------------------------------------------------------------------------------------------------------------------------------------------------------------------------------------------------------------------------------------------------------------------------------------------------------------------------------------------------------------------------------------------------------------------------------------------------------------------------------------------------------------------------------------------------|-----------------------------------------------------------------------------------------------------------------------------------------------------------------------------------------------------------------------------------------------------------------------------------------------------------------------------------------------------------------------------------------------------------------------------------------------------------------------------------------------------------------------------------------------------------------------------------------------------------------------------------------------------------------------------------------------------|
| <p><b>-796</b></p> <p><b>Cons. E box = CARSTG</b></p> <p><i>Hs</i> ccccgggcgagca<b>cagggtg</b> cggccctggccaca //</p> <p><i>Pt</i> ccccgggcgagca<b>cagggtg</b> cggccctggccaca //</p> <p><i>Mac</i> ccccgggcgagca<b>cagggtg</b> cggccctggccaca //</p> <p><i>Bt</i> ccccggaagagca<b>cagggtg</b> cggcccccgccca //</p> <p><i>Cf</i> ccccgagcggagca<b>cagggtg</b> cggccccgaccaca //</p> <p><i>Mm</i> tccagccctggaca<b>cagggtg</b> tggccccgaccaca //</p> <p><i>Rn</i> tccagccctggaca<b>cagggtg</b> tggccccgaccaca //</p> <p><i>St</i> . . . . . //</p> <p><i>Md</i> . . . . . //</p> <p><i>Ee</i> cctccgcccagca<b>cagagtg</b> cgggctgaccgca //</p>                                                    | <p><b>-763</b></p> <p><b>Cons. NRF2 = s</b></p> <p><i>Hs</i> agctccaaccgcggccccg gcgccaagccgcgctcatct</p> <p><i>Pt</i> agctccaaccgcggccccg gcgccaagccgcgctcatct</p> <p><i>Mac</i> agctccaaccgcggccccg gcgccaagccgcgctcatct</p> <p><i>Bt</i> ggctccggcggcagccccg gcgccaaccgcgctcatct</p> <p><i>Cf</i> agctccagcctgcaagccccg gcgccaaccgcgctcaaat</p> <p><i>Mm</i> cgctccagcctgcaagccccg gcgccaagcagcgcctcatct</p> <p><i>Rn</i> cgctccagcctgcaagccccg gcgccaaccgcgctcatct</p> <p><i>St</i> agctccagcctgcaagccccg gcgccaaccgcgctcatct</p> <p><i>Md</i> agctccagacc.atccccg gcgccaaccgcgctcatct</p>                                                                                                    | <p><b>-426</b></p> <p><b>Cons. NRF2 = acMGG</b></p> <p><i>Hs</i> .gtctcctcaccac<b>ccgg</b> .gtctcctcaccac<b>ccgg</b></p> <p><i>Pt</i> .gtctcctcaccac<b>ccgg</b> .gtctcctcaccac<b>ccgg</b></p> <p><i>Mac</i> .gtctcctcaccac<b>ccgg</b> .gtctcctcaccac<b>ccgg</b></p> <p><i>Bt</i> .gtctcctcaccac<b>ccgg</b> .gtctcctcaccac<b>ccgg</b></p> <p><i>Cf</i> .gtctcctcaccac<b>ccgg</b> .gtctcctcaccac<b>ccgg</b></p> <p><i>Mm</i> .gtctcctcaccac<b>ccgg</b> .gtctcctcaccac<b>ccgg</b></p> <p><i>Rn</i> .gtctcctcaccac<b>ccgg</b> .gtctcctcaccac<b>ccgg</b></p> <p><i>St</i> .gtctcctcaccac<b>ccgg</b> .gtctcctcaccac<b>ccgg</b></p> <p><i>Md</i> .gtctcctcaccac<b>ccgg</b> .gtctcctcaccac<b>ccgg</b></p> | <p><b>-349</b></p> <p><b>Cons. E box = CARSTG</b></p> <p><i>Hs</i> .gtctcctcaccac<b>ccgg</b> .gtctcctcaccac<b>ccgg</b></p> <p><i>Pt</i> .gtctcctcaccac<b>ccgg</b> .gtctcctcaccac<b>ccgg</b></p> <p><i>Mac</i> .gtctcctcaccac<b>ccgg</b> .gtctcctcaccac<b>ccgg</b></p> <p><i>Bt</i> .gtctcctcaccac<b>ccgg</b> .gtctcctcaccac<b>ccgg</b></p> <p><i>Cf</i> .gtctcctcaccac<b>ccgg</b> .gtctcctcaccac<b>ccgg</b></p> <p><i>Mm</i> .gtctcctcaccac<b>ccgg</b> .gtctcctcaccac<b>ccgg</b></p> <p><i>Rn</i> .gtctcctcaccac<b>ccgg</b> .gtctcctcaccac<b>ccgg</b></p> <p><i>St</i> .gtctcctcaccac<b>ccgg</b> .gtctcctcaccac<b>ccgg</b></p> <p><i>Md</i> .gtctcctcaccac<b>ccgg</b> .gtctcctcaccac<b>ccgg</b></p> |
| <p><b>-348</b></p> <p><b>Cons. NRF2 = s</b></p> <p><i>Hs</i> .gtctcctcaccac<b>ccgg</b> .gtctcctcaccac<b>ccgg</b></p> <p><i>Pt</i> .gtctcctcaccac<b>ccgg</b> .gtctcctcaccac<b>ccgg</b></p> <p><i>Mac</i> .gtctcctcaccac<b>ccgg</b> .gtctcctcaccac<b>ccgg</b></p> <p><i>Bt</i> .gtctcctcaccac<b>ccgg</b> .gtctcctcaccac<b>ccgg</b></p> <p><i>Cf</i> .gtctcctcaccac<b>ccgg</b> .gtctcctcaccac<b>ccgg</b></p> <p><i>Mm</i> .gtctcctcaccac<b>ccgg</b> .gtctcctcaccac<b>ccgg</b></p> <p><i>Rn</i> .gtctcctcaccac<b>ccgg</b> .gtctcctcaccac<b>ccgg</b></p> <p><i>St</i> .gtctcctcaccac<b>ccgg</b> .gtctcctcaccac<b>ccgg</b></p> <p><i>Md</i> .gtctcctcaccac<b>ccgg</b> .gtctcctcaccac<b>ccgg</b></p>  | <p><b>-231</b></p> <p><b>Cons. NRF2 = acMGG</b></p> <p><i>Hs</i> .gtctcctcaccac<b>ccgg</b> .gtctcctcaccac<b>ccgg</b></p> <p><i>Pt</i> .gtctcctcaccac<b>ccgg</b> .gtctcctcaccac<b>ccgg</b></p> <p><i>Mac</i> .gtctcctcaccac<b>ccgg</b> .gtctcctcaccac<b>ccgg</b></p> <p><i>Bt</i> .gtctcctcaccac<b>ccgg</b> .gtctcctcaccac<b>ccgg</b></p> <p><i>Cf</i> .gtctcctcaccac<b>ccgg</b> .gtctcctcaccac<b>ccgg</b></p> <p><i>Mm</i> .gtctcctcaccac<b>ccgg</b> .gtctcctcaccac<b>ccgg</b></p> <p><i>Rn</i> .gtctcctcaccac<b>ccgg</b> .gtctcctcaccac<b>ccgg</b></p> <p><i>St</i> .gtctcctcaccac<b>ccgg</b> .gtctcctcaccac<b>ccgg</b></p> <p><i>Md</i> .gtctcctcaccac<b>ccgg</b> .gtctcctcaccac<b>ccgg</b></p> | <p><b>-115</b></p> <p><b>Cons. NRF2 = acMGG</b></p> <p><i>Hs</i> .gtctcctcaccac<b>ccgg</b> .gtctcctcaccac<b>ccgg</b></p> <p><i>Pt</i> .gtctcctcaccac<b>ccgg</b> .gtctcctcaccac<b>ccgg</b></p> <p><i>Mac</i> .gtctcctcaccac<b>ccgg</b> .gtctcctcaccac<b>ccgg</b></p> <p><i>Bt</i> .gtctcctcaccac<b>ccgg</b> .gtctcctcaccac<b>ccgg</b></p> <p><i>Cf</i> .gtctcctcaccac<b>ccgg</b> .gtctcctcaccac<b>ccgg</b></p> <p><i>Mm</i> .gtctcctcaccac<b>ccgg</b> .gtctcctcaccac<b>ccgg</b></p> <p><i>Rn</i> .gtctcctcaccac<b>ccgg</b> .gtctcctcaccac<b>ccgg</b></p> <p><i>St</i> .gtctcctcaccac<b>ccgg</b> .gtctcctcaccac<b>ccgg</b></p> <p><i>Md</i> .gtctcctcaccac<b>ccgg</b> .gtctcctcaccac<b>ccgg</b></p> | <p><b>-4</b></p> <p><b>Cons. NRF1 = yGCGCAYGCGCr</b></p> <p><i>Hs</i> .gaggggaaccagg. . . . . gagggg. aggcagggt. gc</p> <p><i>Pt</i> .gaggggaaccagg. . . . . gagggg. aggcagggt. gc</p> <p><i>Mac</i> .gaggggaaccagg. . . . . gagggg. aggcagggt. gc</p> <p><i>Bt</i> .gaggggaaccagg. . . . . gagggg. aggcagggt. gc</p> <p><i>Cf</i> .gaggggaaccagg. . . . . gagggg. aggcagggt. gc</p> <p><i>Mm</i> .gaggggaaccagg. . . . . gagggg. aggcagggt. gc</p> <p><i>Rn</i> .gaggggaaccagg. . . . . gagggg. aggcagggt. gc</p> <p><i>St</i> .gaggggaaccagg. . . . . gagggg. aggcagggt. gc</p> <p><i>Md</i> .gaggggaaccagg. . . . . gagggg. aggcagggt. gc</p>                                                    |
| <p><b>-3 +1</b></p> <p><b>CTAWWWNTAR = Cons. MEF2</b></p> <p><i>Hs</i> .cta<b>AAAAATAG</b>CCCCGGTGTG GGGATCCGTGCGCGGATGTC</p> <p><i>Pt</i> .cta<b>AAAAATAG</b>CCCCGGTGTG GGGATCCGTGCGCGGATGTC</p> <p><i>Mac</i> .cta<b>AAAAATAG</b>CCCCGGTGTG GGGATCCGTGCGCGGATGTC</p> <p><i>Bt</i> .cta<b>AAAAATAG</b>CCCCGGTGTG GGGATCCGTGCGCGGATGTC</p> <p><i>Cf</i> .cta<b>AAAAATAG</b>CCCCGGTGTG GGGATCCGTGCGCGGATGTC</p> <p><i>Mm</i> .cta<b>AAAAATAG</b>CCCCGGTGTG GGGATCCGTGCGCGGATGTC</p> <p><i>Rn</i> .cta<b>AAAAATAG</b>CCCCGGTGTG GGGATCCGTGCGCGGATGTC</p> <p><i>St</i> .cta<b>AAAAATAG</b>CCCCGGTGTG GGGATCCGTGCGCGGATGTC</p> <p><i>Md</i> .cta<b>AAAAATAG</b>CCCCGGTGTG GGGATCCGTGCGCGGATGTC</p> | <p><b>+111</b></p> <p><b>Cons. MEF2</b></p> <p><i>Hs</i> . . . . . CCGGGCTCGCGCGTG</p> <p><i>Pt</i> . . . . . CCGGGCTCGCGCGTG</p> <p><i>Mac</i> . . . . . CCGGGCTCGCGCGTG</p> <p><i>Bt</i> . . . . . CCGGGCTCGCGCGTG</p> <p><i>Cf</i> . . . . . CCGGGCTCGCGCGTG</p> <p><i>Mm</i> . . . . . CCGGGCTCGCGCGTG</p> <p><i>Rn</i> . . . . . CCGGGCTCGCGCGTG</p> <p><i>St</i> . . . . . CCGGGCTCGCGCGTG</p> <p><i>Md</i> . . . . . CCGGGCTCGCGCGTG</p>                                                                                                                                                                                                                                                   |                                                                                                                                                                                                                                                                                                                                                                                                                                                                                                                                                                                                                                                                                                   |                                                                                                                                                                                                                                                                                                                                                                                                                                                                                                                                                                                                                                                                                                     |

*NRF1 Regulates MEF2A Expression*  
Figure S2.

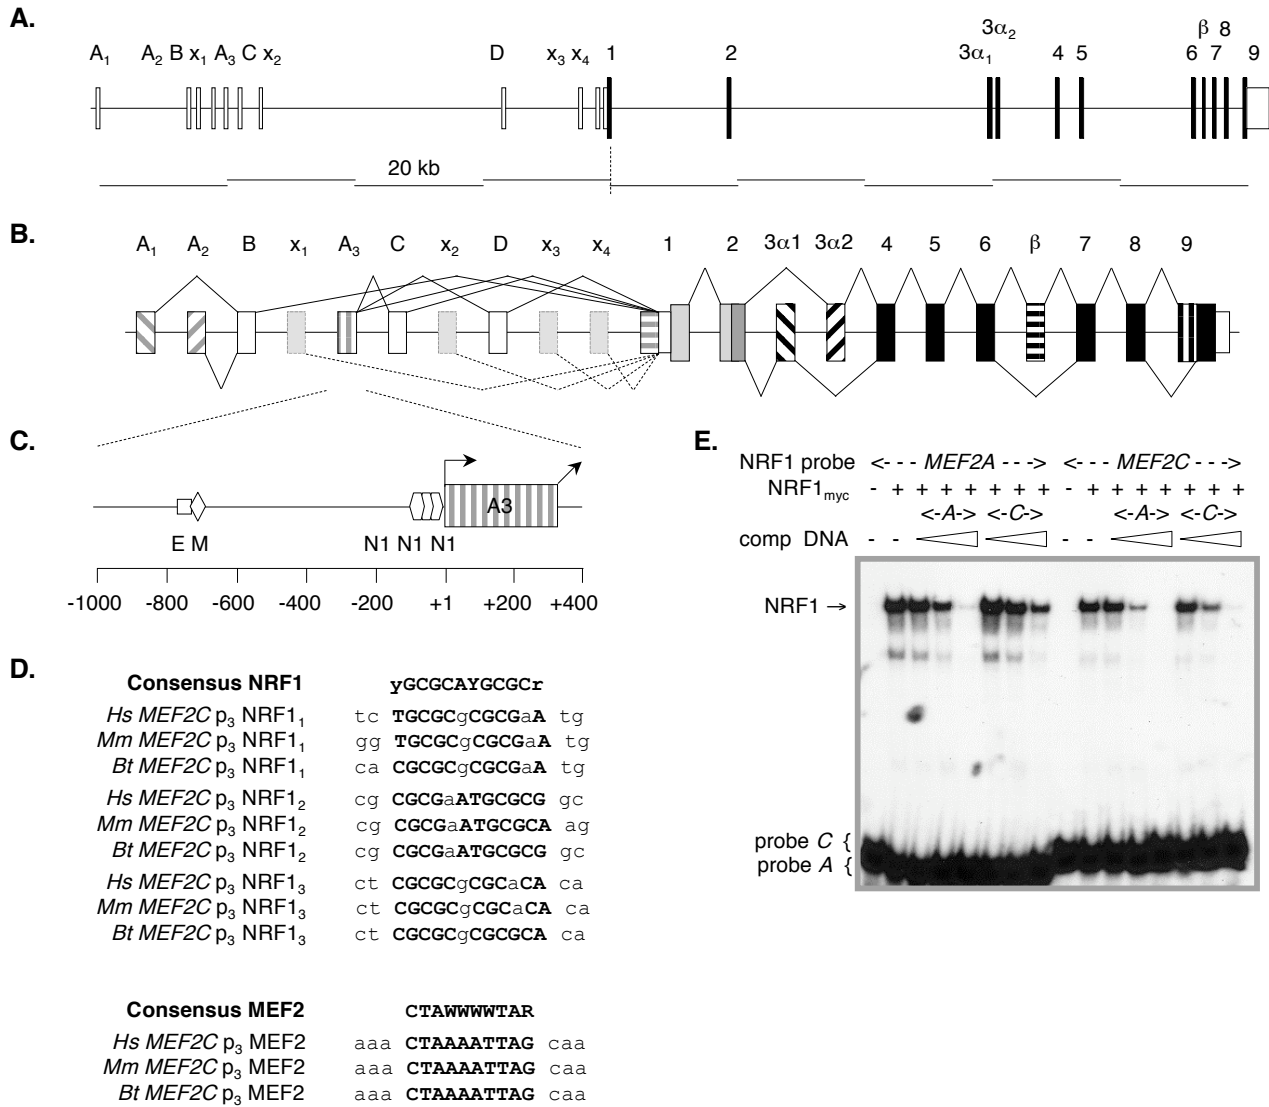

*NRF1 Regulates MEF2A Expression*  
*Figure S3.*

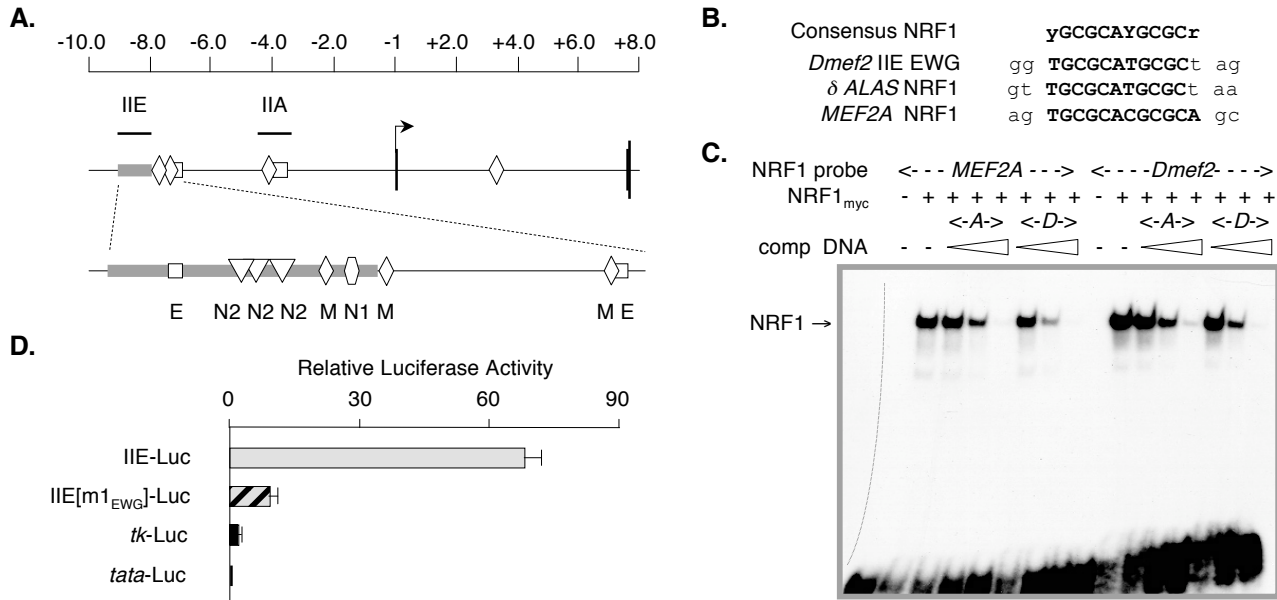

Supplement: jbc_M707389200_1.pdf [file jbc_M707389200_1.pdf]
